# Supplementary material
Source: PubMed Central journal article supplement (PMC6459719)
Supplement: NIHMS1522721-supplement-284_2019_1656_MOESM1_ESM.pdf [file NIHMS1522721-supplement-284_2019_1656_MOESM1_ESM.pdf]

## Supplementary Data

| <i>Table S1. Kronos gene coordinates</i> |                                        |                                                     |
|------------------------------------------|----------------------------------------|-----------------------------------------------------|
| <i>Gene coordinates</i>                  | <i>Gene product</i>                    | <i>Significant GenBank protein matches (Yes/No)</i> |
| 80..319                                  | HNH endonuclease                       | Yes                                                 |
| 540..1028                                | Terminase, small subunit (TerS)        | Yes                                                 |
| 1032..2756                               | Terminase, large subunit (TerL)        | Yes                                                 |
| 2791..4083                               | Portal protein                         | Yes                                                 |
| 4076..5038                               | Protease IV                            | Yes                                                 |
| 5125..6489                               | Major capsid protein                   | Yes                                                 |
| 6575..7309                               | Hypothetical protein                   | No                                                  |
| 7480..8211                               | Gp6-like head-tail connector           | Yes                                                 |
| 8216..8596                               | Hypothetical protein                   | No                                                  |
| 8600..9094                               | Gp10 tail component                    | Yes                                                 |
| 9094..9510                               | DUF3168 protein                        | Yes                                                 |
| 9529..9987                               | Tail protein                           | Yes                                                 |
| 9991..10410                              | Hypothetical protein                   | No                                                  |
| 10434..10724                             | Hypothetical protein                   | Yes                                                 |
| 10729..13623                             | Tail length-tape measure protein       | Yes                                                 |
| 13633..14220                             | Hypothetical protein                   | Yes                                                 |
| 14220..14864                             | Hypothetical protein                   | Yes                                                 |
| 14870..15358                             | Hypothetical protein                   | Yes                                                 |
| 15496..18321                             | Host specificity protein J             | Yes                                                 |
| 18318..18746                             | Tail assembly chaperone protein        | Yes                                                 |
| 18756..19031                             | Hypothetical protein                   | No                                                  |
| 19047..23066                             | Fibronectin type III domain protein    | Yes                                                 |
| 23069..23416                             | Hypothetical protein                   | No                                                  |
| 23413..24144                             | Phage long tail fiber proximal subunit | Yes                                                 |
| 24148..24648                             | Hypothetical protein                   | No                                                  |
| 24698..24874                             | Hypothetical protein                   | No                                                  |
| 24983..25195c                            | Hypothetical protein                   | No                                                  |
| 25206..25772c                            | Hypothetical protein                   | No                                                  |
| 25873..26511c                            | Hypothetical protein                   | No                                                  |
| 26508..26813c                            | Hypothetical protein                   | No                                                  |
| 26828..27328c                            | Hypothetical protein                   | No                                                  |
| 27328..28521c                            | Hypothetical protein                   | No                                                  |
| 28590..29693c                            | Hypothetical protein                   | No                                                  |
| 29697..30266c                            | Hypothetical protein                   | No                                                  |
| 30344..31309c                            | Hypothetical protein                   | Yes                                                 |
| 31394..31822c                            | DUF2303 protein                        | Yes                                                 |
| 31983..32198c                            | Hypothetical protein                   | Yes                                                 |
| 32195..33403c                            | Hypothetical protein                   | No                                                  |
| 33407..33913c                            | Hypothetical protein                   | No                                                  |
| 33910..34281c                            | Hypothetical protein                   | No                                                  |
| 34278..34880c                            | Hypothetical protein                   | No                                                  |

## Supplementary Data

|               |                                   |     |
|---------------|-----------------------------------|-----|
| 34883..35530c | Hypothetical protein              | No  |
| 35543..35764c | Hypothetical protein              | No  |
| 35826..36095c | Hypothetical protein              | No  |
| 36147..36590  | Hypothetical protein              | No  |
| 36593..36748  | Hypothetical protein              | No  |
| 36745..37392  | VRR-NUC domain-containing protein | Yes |
| 37389..37784  | Hypothetical protein              | No  |
| 37784..38038  | Hypothetical protein              | No  |
| 38092..38475  | Hypothetical protein              | Yes |
| 38472..39305  | Hypothetical protein              | Yes |
| 39314..39604  | Hypothetical protein              | No  |
| 39601..39771  | Hypothetical protein              | No  |
| 39768..39971  | Hypothetical protein              | No  |
| 39968..40222  | Hypothetical protein              | No  |
| 40267..41043  | Phage protein                     | Yes |
| 41040..41774  | Hypothetical protein              | No  |
| 41809..42390  | Hypothetical protein              | No  |

### Supplementary Fig. 1

CBR1 16S nucleotide sequence: 836 bp

5'-

```
TTGCCTTTGATACTGGCAGTCTNGAGTACGGAAGAGGTATGTGGA ACTCCGAGTGTAGAGGT
GAAATTNGTAGATATTCGGAAGAACACCAGTGGCGAAGGCCGACATACTGGTCCGTTACTGA
CGCTGAGGCTCGAAAGCGTGGGGAGCAAACAGGATTAGATACCCTGGTAGTNCACGCCGTA
AACGATGAGTGCTAGTTGTCGGCATGCATGCATGTCGGTGACGCAGCTAACGCATTAAGCAC
TCCGCCTGGGGAGTACGGTCGCAAGATTA AAACTCAAAGGAATTGACGGGGGCCGCACAA
GCGGTGGAGCATGTGGTTTAATTCGAAGCAACGCGCAGAACCTTACCACCTTTTGACATGCC
TGGACCGCCACAGAGATGTGGTTTTCCCTTCGGGGACTGGGACACAGGTGCTGCATGGCTGT
CGTCAGCTCGTGTCGTGAGTGTTGGGTTAAGTCCCGCAACGAGCGCAACCCTCGCGATTAGT
TGCCATCAGGTTTGGCTGGGCACTCTAATCGTACTGCCGGAGTTAATCCGGAGGAAGGCCGG
GATGACGTCAAGTCCTCATGGCCCTTACAAGGTGGGCTACACACGTGCTACAATGGCGACTA
CAGAGGGCTGCAATCCCGCGAGGGGGAGCCAATCCCTAAAAGTCGTCTCAGTTCGGATTGTT
CTCTGCAACTCGAGAGCATGAAGTTGGAATCGCTAGTAATCGNGGTNCCAGCAGCCGCGGT
AAATACGTTCCCGGGCCTTGTACACACCCGCCGTCACACCATGGGAGTTGGCTTTACCCGAA
GGCGCTGCGCTAACTCGCAAGAGAGGCAGGCGAC-3'
```

## Supplementary Data

### Top 5 BLASTn Hits

|                                                 | Query coverage | E   | ID  | Accession number |
|-------------------------------------------------|----------------|-----|-----|------------------|
| Caulobacter sp. strain NS11A2 16S rRNA gene     | 93%            | 0.0 | 98% | MH899441.1       |
| Caulobacter sp. strain NS11A1 16S rRNA gene     | 93%            | 0.0 | 98% | MH899440.1       |
| C. vibrioides strain ICMP 22274 16S rRNA gene   | 93%            | 0.0 | 97% | MH392697.1       |
| Caulobacter sp. strain ICMP 22305 16S rRNA gene | 93%            | 0.0 | 97% | MH392643.1       |
| Caulobacter sp. strain ICMP 22304 16S rRNA gene | 93%            | 0.0 | 97% | MH392642.1       |
